# Supplementary material
Source: PubMed Central journal article supplement (PMC6011231)
Supplement: NIHMS974111-supplement-1.pdf [file NIHMS974111-supplement-1.pdf]

## INVENTORY OF SUPPLEMENTAL INFORMATION

### Regulation of epithelial plasticity determines metastatic organotropism in pancreatic cancer

Maximilian Reichert, Basil Bakir, Leticia Moreira, Jason R. Pitarresi, Karin Feldmann, Lauren Simon, Kensuke Suzuki, Ravikanth Maddipati, Andrew D. Rhim, Anna M. Schlitter, Mark Kriegsmann, Wilko Weichert, Matthias Wirth, Kathleen Schuck, Günter Schneider, Dieter Saur, Albert B. Reynolds, Andres Klein-Szanto, Burcin Pehlivanoglu, Bahar Memis, N. Volkan Adsay, and Anil K. Rustgi

#### SUPPLEMENTAL FIGURES:

Figure S1, related to Figure 1: *p120ctn* is required for both exocrine compartment homeostasis and regeneration after pancreatitis.

Figure S2, related to Figure 1: P120CTN and E-CADHERIN remain co-localized at the membrane in PanIN lesions and PDAC.

Figure S3, related to Figure 2: Circulating tumor cells from KPCY mice differ in their epithelial characteristics based on whether they are single cells or clusters.

Figure S4, related to Figure 4: *Kras<sup>G12D</sup>; Rosa26<sup>YFP</sup> (KY)* cells demonstrate the ability to colonize the lung regardless of *p120ctn* status.

Figure S5, related to Figure 5: *Kras<sup>G12D/wt</sup>; p120ctn<sup>wt/fl</sup>; Rosa26<sup>YFP</sup> (KYp120<sup>wt/fl</sup>)* cells give rise to both solid and cystic lesions.

Figure S6, related to Figure 6: P120CTN and E-CADHERIN expression in human IPMN and pancreatic neuroendocrine tumors.

Figure S7, related to Figure 7: Metastatic organotropism is dependent on epithelial-mesenchymal plasticity in multiple genetic and implantation models of pancreatic cancer.

## SUPPLEMENTAL TABLES:

Table S1, related to Figure 1: Delineation of 32 *Pdx1-cre*; *Kras*<sup>G12D/wt</sup>; *Rosa26*<sup>YFP</sup> mice characteristics

Table S2, related to Figure 1: Delineation of 38 *Pdx1-cre*; *Kras*<sup>G12D/wt</sup>; *p120ctn*<sup>wt/fl</sup>; *Rosa26*<sup>YFP</sup> mice characteristics

Table S3, related to Figure 2: Quantification of metastatic lesions in 18 *Pdx1-cre*; *Kras*<sup>G12D/wt</sup>; *p53*<sup>wt/fl</sup>; *Rosa26*<sup>YFP</sup> mice

Table S4, related to Figure 2: Quantification of metastatic lesions in 10 *Pdx1-cre*; *Kras*<sup>G12D/wt</sup>; *p53*<sup>wt/fl</sup>; *p120ctn*<sup>wt/fl</sup>; *Rosa26*<sup>YFP</sup> mice

Table S5, related to Figure 5: Delineation of characteristics of long-term orthotopic transplantation with *Kras*<sup>G12D/wt</sup>; *p120ctn*<sup>fl/fl</sup>; *Rosa26*<sup>YFP</sup> cells

Table S6, related to Figure 5: Delineation of characteristics of long-term orthotopic transplantation with *Kras*<sup>G12D/wt</sup>; *p120ctn*<sup>fl/fl</sup>; *Rosa26*<sup>YFP</sup> cells rescued with the p120ctn1A isoform

Table S7, related to Figure 6: Characteristics of Human Tumor Microarray

## Supplemental Figure Legends

**Figure S1, related to Figure 1: *p120ctn* is required for both exocrine compartment homeostasis and regeneration after pancreatitis. A.** Genetic schematic of *Pdx1-cre; p120ctn<sup>fl/fl</sup>; Rosa26<sup>YFP</sup>* mice. **B.** P120CTN (green) is lost in a mosaic fashion in the ductal compartment as well as acinar compartment. **C.** Relative amylase levels are significantly decreased in three independent age-matched cohorts (n = 3 per genotype per time interval). T-test. **D.** Representative histology of *Pdx1-cre; p120ctn<sup>wt/wt</sup>*, *Pdx1-cre; p120ctn<sup>wt/fl</sup>*, and *Pdx1-cre; p120ctn<sup>fl/fl</sup>* mice (60-, 74-, and 55-weeks of age, respectively) and P120CTN/E-CADHERIN staining of the acinar and endocrine compartments. Note that whereas P120CTN and E-CADHERIN are localized at the membrane in mice with either wild-type or heterozygous *p120ctn*, homozygous *p120ctn* loss results in fatty degeneration surrounding solitary islets. **E.** Unlike the exocrine compartment of *Pdx1-cre; p120ctn<sup>fl/fl</sup>* mice, recombined islets (as indicated by YFP+ staining) appear to not require P120CTN for normal architecture. **F.** Pancreata of *Pdx1-cre; p120ctn<sup>fl/fl</sup>* mice are atrophic 7 days post-pancreatitis induction. **G.** Whereas wild-type have recovered 7 days post-pancreatitis induction, *Pdx1-cre; p120ctn<sup>fl/fl</sup>* mice show persistent edema, inflammation, and acinar-to-ductal metaplasia (as shown by DBA staining). *Pdx1-cre; p120ctn<sup>wt/fl</sup>* mice show an intermediate phenotype. **H.** 3 mice per genotype per time point (with the exception of day 1 and 3 of mice with bi-allelic *p120ctn* loss, where only 2 mice were analyzed) were analyzed for edema, inflammation, vacuolization, and necrosis based upon a published pancreatitis scoring system (Rongione et

al., 1997). Three high-powered fields per mouse. Mice with *bi-allelic* p120ctn loss showed significantly impaired regenerative capability 7-days post-induction. Multiple t-tests with Holm-Sidak Correction and assumed equivalent scatter. 50  $\mu$ m scale bar for histology. 10 mm for gross pathology.

**Figure S2, related to Figure 1: P120CTN and E-CADHERIN remain co-localized at the membrane in PanIN lesions and PDAC. A.** Spectrum of pancreatic lesions in *Pdx1-cre; Kras<sup>G12D/wt</sup>; Rosa26<sup>YFP</sup>* (KCY) (n = 32) and *Pdx1-cre; Kras<sup>G12D</sup>; p120ctn<sup>wt/fl</sup>; Rosa26<sup>YFP</sup>* (KCYp120<sup>wt/fl</sup>) (n = 38) mice expressed as a percentage of total mice in each cohort. **B.** P120CTN, E-CADHERIN, and YFP staining of *KCY* and *KCYp120<sup>wt/fl</sup>* mice show co-localization of P120CTN and E-CADHERIN at all stages of disease. 50  $\mu$ m scale bar. (1:50 ECad; 1:250 p120; 1:250 YFP)

**Figure S3, related to Figure 2: Circulating tumor cells from KPCY mice differ in their epithelial characteristics based on whether they are single cells or clusters. A.** Single cells or clusters of circulating tumor cells were stained for E-CADHERIN, P120CTN, and YFP. **B.** Single cells or clusters of circulating tumor cells were stained for E-CADHERIN,  $\beta$ -CATENIN, and YFP. **C.** Clusters of circulating tumor cells were stained for CYTOKERATIN-19. 10  $\mu$ m scale bar.

**Figure S4, related to Figure 4: *Kras*<sup>G12D</sup>; *Rosa26*<sup>YFP</sup> (KY) cells demonstrate the ability to colonize the lung regardless of *p120ctn* status. A.**

Representative FACS plots (x=GFP/YFP; y=FSC) of PDCs with indicated genotypes. YFP positive (YFP+) PDC lines (n=9) were derived from age-matched mice (6-15 weeks). In vitro lentiviral Cre-recombination was performed after a given PDC line was established. Phase-contrast photographs of 9 independently derived KY lines with different *p120ctn* status: *p120ctn*<sup>wt/wt</sup>, *p120ctn*<sup>wt/fl</sup>, *p120ctn*<sup>fl/fl</sup>. **B.** Athymic nude mice were retro-orbitally injected with 750,000 cells from these genotypes and harvested 21 days post-injection. 50 μm scale bar for histology.

**Figure S5, related to Figure 5: *Kras*<sup>G12D/wt</sup>; *p120ctn*<sup>wt/fl</sup>; *Rosa26*<sup>YFP</sup> (*KYp120*<sup>wt/fl</sup>) cells give rise to both solid and cystic lesions. A.** Athymic nude mice were orthotopically injected with *KYp120ctn*<sup>wt/fl</sup> cells and harvested 101 to 180 days post-implantation. Lesions were classified, based on both gross pathology and histology, as to whether they were solid, cystic, or mixed. 4/12 mice had no tumor penetrance. **B.** Athymic nude mice were orthotopically injected with *KYp120ctn*<sup>wt/fl</sup> cells and harvested 180 days post-implantation. Gross pathology was markedly different, with either solid tumors or clear fluid-filled cystic lesions. 1 mm scale bar for gross pathology. 50 μm scale bar for histology.

**Figure S6, related to Figure 6: P120CTN and E-CADHERIN expression in human IPMN and pancreatic neuroendocrine tumors. A.** P120CTN expression in human IPMN. Multiple histological subtypes of human IPMN, including gastric-type, intestinal-type, and pancreatobiliary (PB)-type, and unspecified IPMN were stained for P120CTN. Binomial test. **B.** P120CTN expression in human IPMN. **C.** E-CADHERIN intensity is higher in the membranous compartment compared to the cytoplasmic compartment in human IPMN. Wilcoxon Test. **D.** E-CADHERIN expression in human IPMN. **E.** Comparison of localization in human PNET (n = 9) for P120CTN and E-CADHERIN. P120CTN was membranous (M) in 0/9 samples, whereas it was cytoplasmic (C) in 7/9 with or without nuclear (N) staining. E-CADHERIN was demonstrated an absence of any purely membranous samples. Binomial Test. **F.** E-CADHERIN intensity is higher in the cytoplasmic compartment than at the membrane in human PNET. Wilcoxon Test. **G.** Normal human pancreas (n = 2), taken from non-affected tissue adjacent to PNET, shows robust membranous P120CTN and E-CADHERIN localization in both acini and ducts. Interestingly, islets appear to have less membranous staining than the exocrine pancreas. **H.** PNET demonstrates minimal membranous staining for either P120CTN or E-CADHERIN. Scale bar: 50  $\mu$ m. \*p < .05, \*\*p < .01, \*\*\*p < .001.

**Figure S7, related to Figure 7: Metastatic organotropism is dependent on epithelial-mesenchymal plasticity in multiple genetic and implantation models of pancreatic cancer.**

## Supplemental Table Legends

### **Table S1, related to Figure 1: Delineation of 32 *Pdx1-cre; Kras<sup>G12D/wt</sup>; Rosa26<sup>YFP</sup>* mice characteristics**

Mouse ID, age, pathological state, and notes for all 32 *Pdx1-cre; Kras<sup>G12D/wt</sup>; Rosa26<sup>YFP</sup>* analyzed. PanIN, Pancreatic Intraepithelial Neoplasia. IPMN, Intraductal Papillary Mucinous Neoplasm.

### **Table S2, related to Figure 1: Delineation of 38 *Pdx1-cre; Kras<sup>G12D/wt</sup>; p120ctn<sup>wt/fl</sup>; Rosa26<sup>YFP</sup>* mice characteristics**

Mouse ID, age, pathological state, and notes for all 38 *Pdx1-cre; Kras<sup>G12D/wt</sup>; p120ctn<sup>wt/fl</sup>; Rosa26<sup>YFP</sup>* analyzed. PanIN, Pancreatic Intraepithelial Neoplasia. MCN, Mucinous Cystic Neoplasm. IPMN, Intraductal Papillary Mucinous Neoplasm.

### **Table S3, related to Figure 2: Quantification of metastatic lesions in 18 *Pdx1-cre; Kras<sup>G12D/wt</sup>; p53<sup>wt/fl</sup>; Rosa26<sup>YFP</sup>* mice**

### **Table S4, related to Figure 2: Quantification of metastatic lesions in 10 *Pdx1-cre; Kras<sup>G12D/wt</sup>; p53<sup>wt/fl</sup>; p120ctn<sup>wt/fl</sup>; Rosa26<sup>YFP</sup>* mice**

### **Table S5, related to Figure 5: Delineation of characteristics of long-term orthotopic transplantation with *Kras<sup>G12D/wt</sup>; p120ctn<sup>fl/fl</sup>; Rosa26<sup>YFP</sup>* cells**

**Table S6, related to Figure 5: Delineation of characteristics of long-term orthotopic transplantation with *Kras*<sup>G12D/wt</sup>; *p120ctn*<sup>fl/fl</sup>; *Rosa26*<sup>YFP</sup> cells rescued with the p120ctn1A isoform**

**Table S7, related to Figure 6: Characteristics of Human Tumor Microarray**



**A** *Pdx1-cre; p120ctn<sup>wt/fl</sup>; Rosa26<sup>LSL-YFP</sup>*

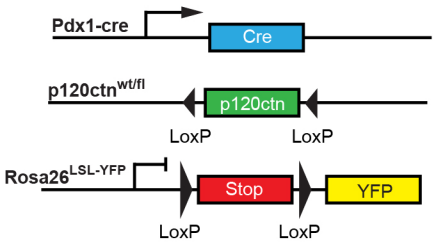

**B**

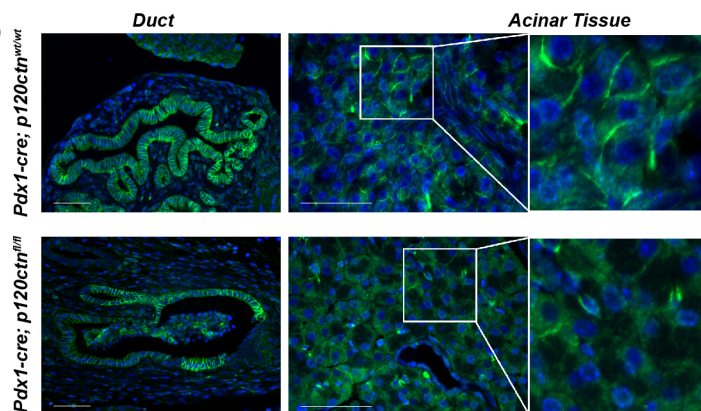

**C**

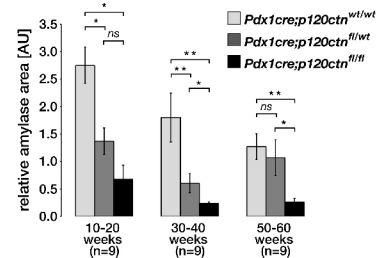

**D**

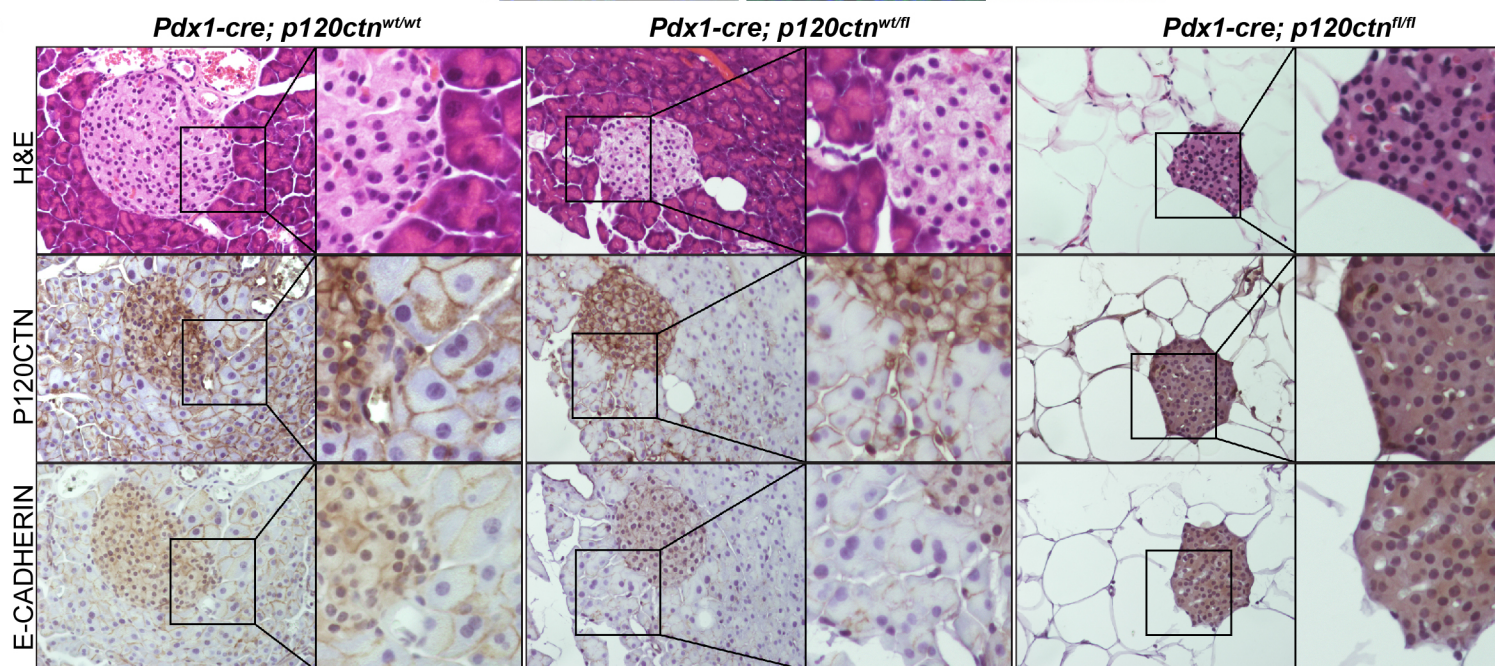

**E**

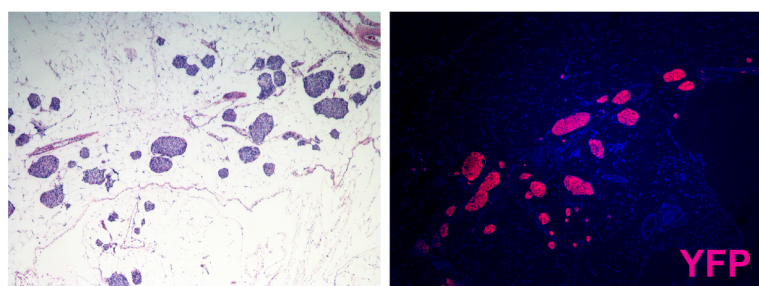

**F**

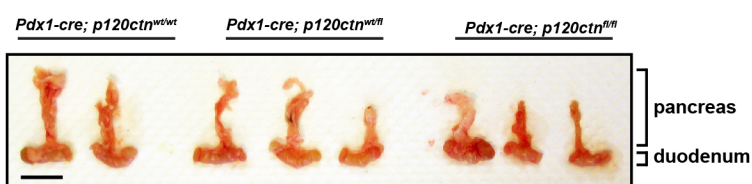

**G**

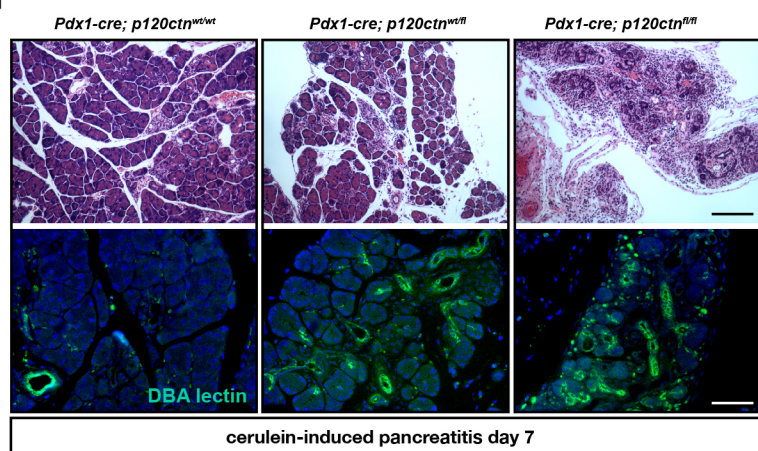

**H**

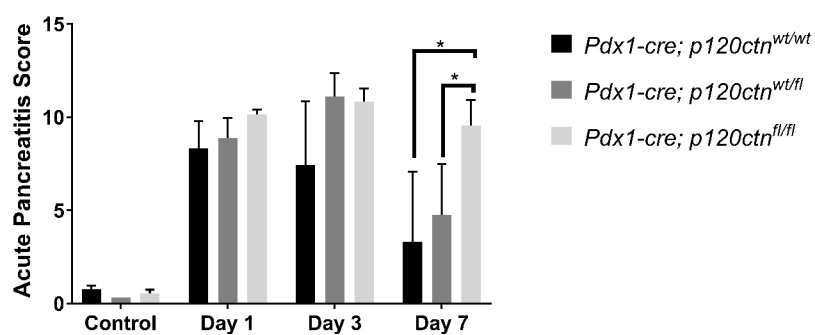

B

*Pdx1-cre; KRAS<sup>G12D/wt</sup>; Rosa26<sup>YFP</sup>*

*Pdx1-cre; KRAS<sup>G12D/wt</sup>; p120ctn<sup>wfl/fl</sup>; Rosa26<sup>YFP</sup>*

Adenocarcinoma - 20 weeks of age

Liver Metastasis

Primary Tumor

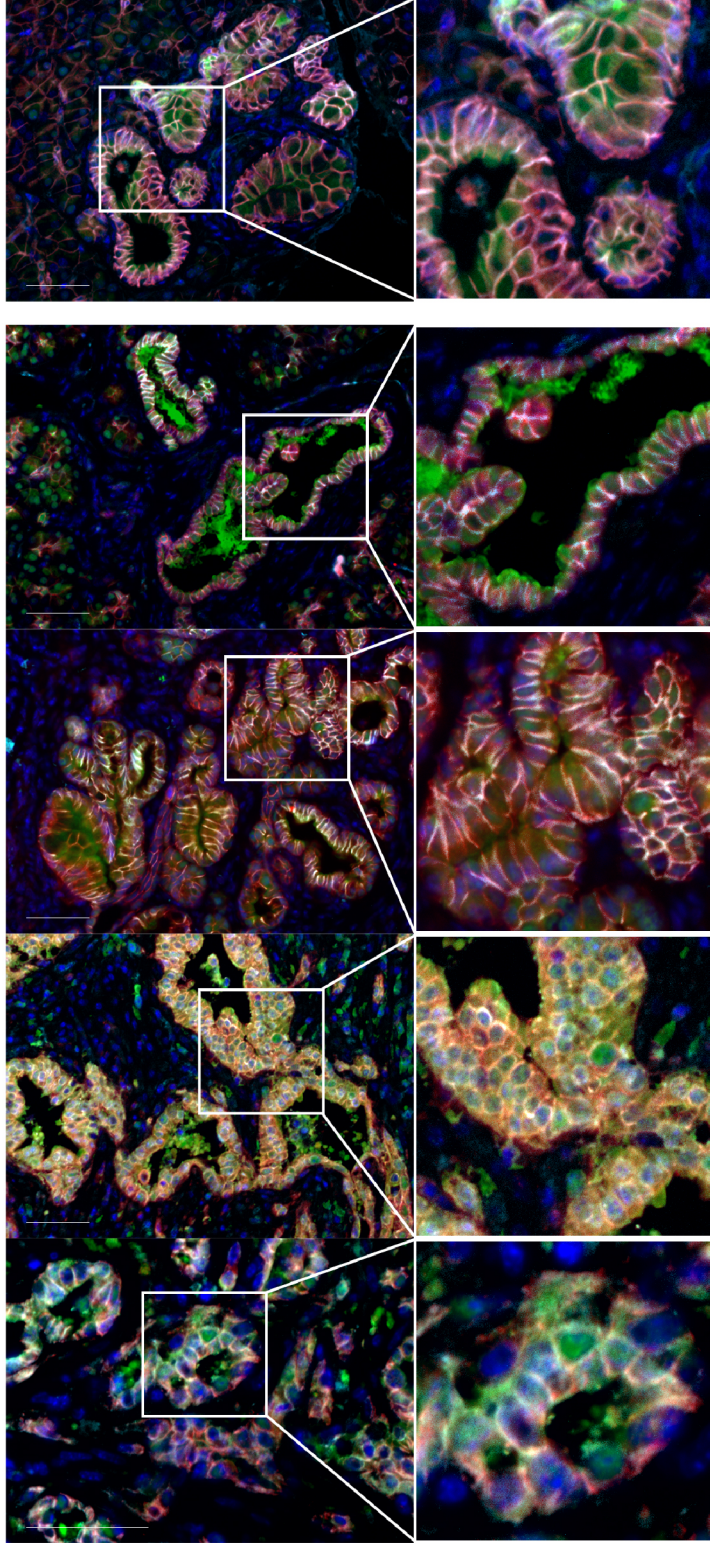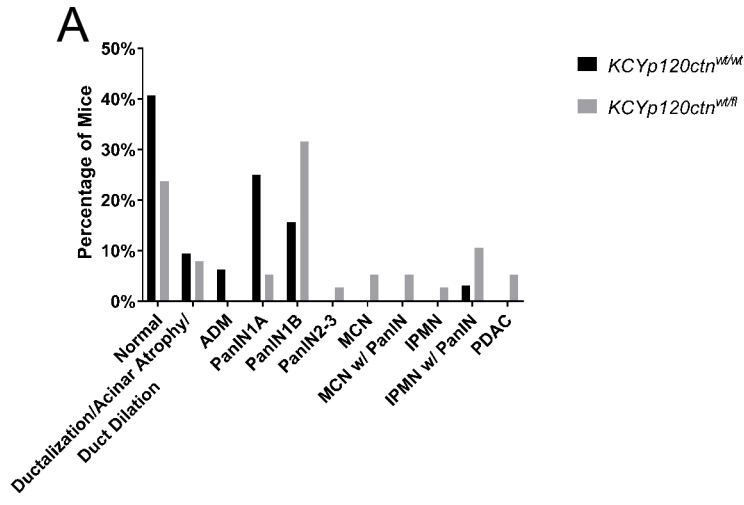

Red - E-CADHERIN  
 Green - YFP  
 Cyan - P120CTN  
 Blue - DAPI

A

P120CTN/YFP/DAPI  
E-CADHERIN IN WHITE

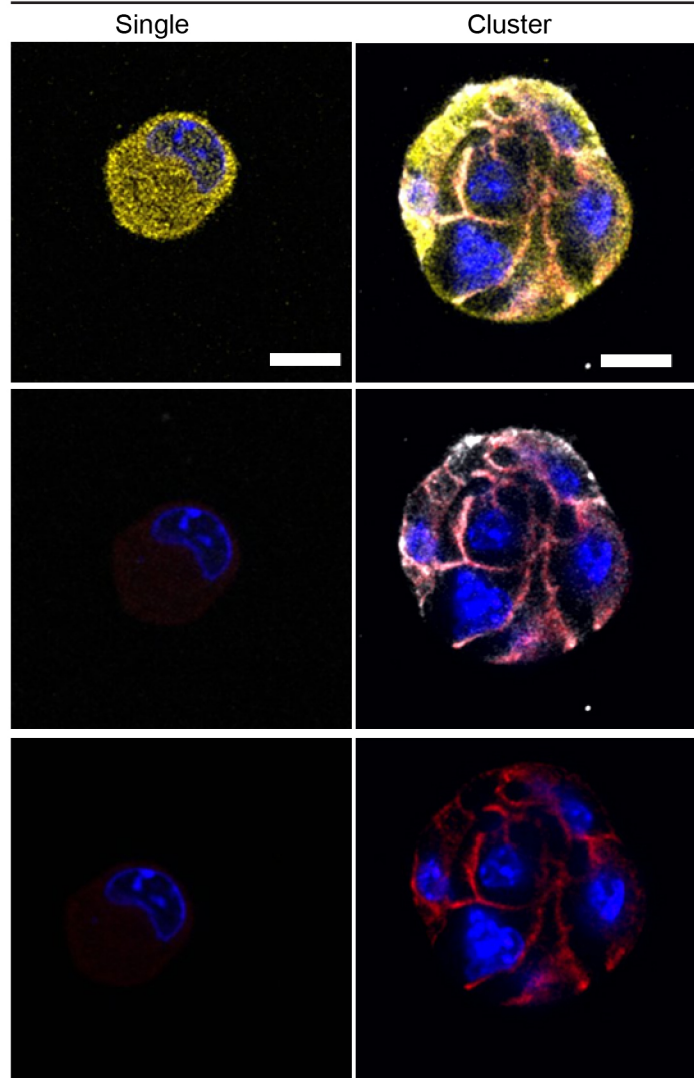

B

$\beta$ -CATENIN/YFP/DAPI  
E-CADHERIN IN WHITE

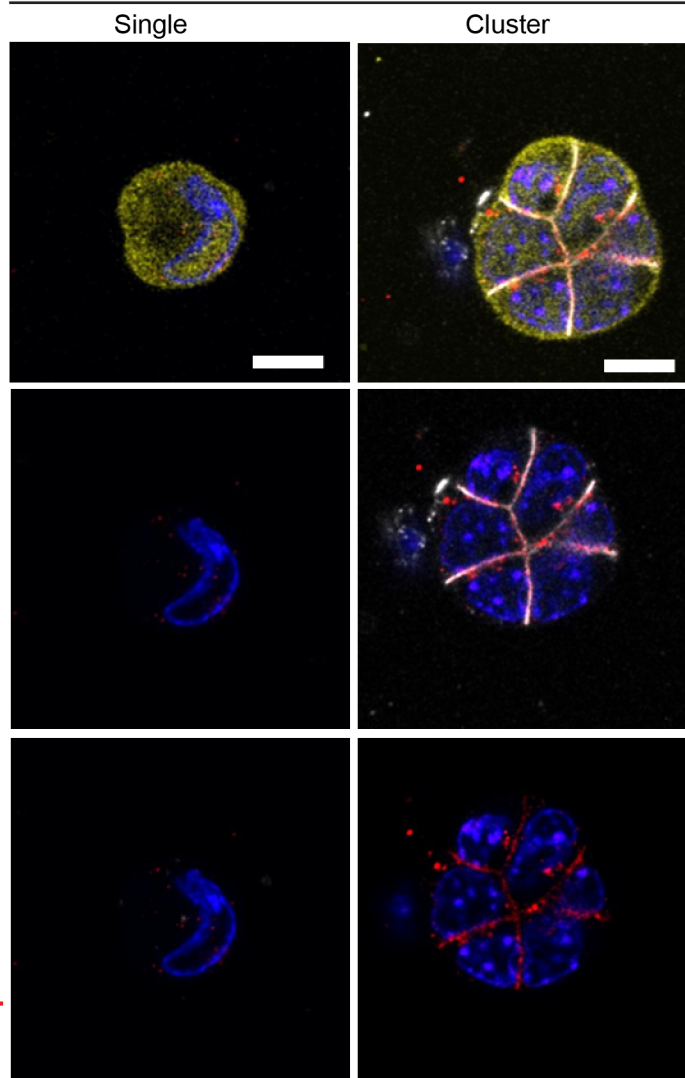

C

B-CATENIN/YFP/DAPI  
E-CADHERIN IN WHITE

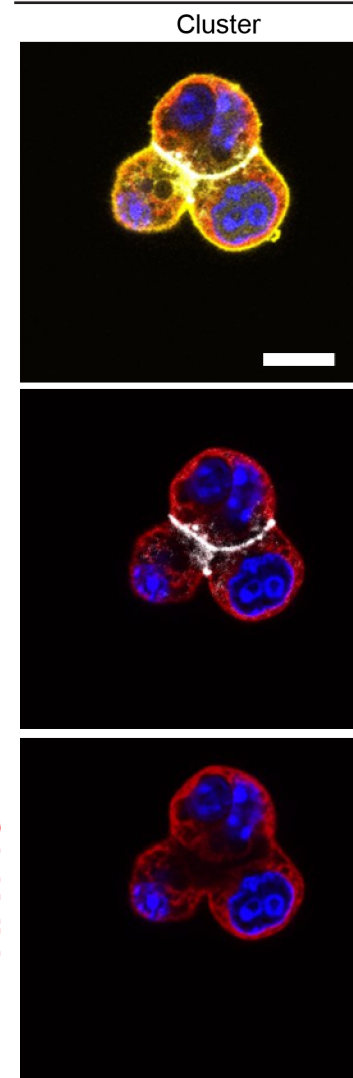

A

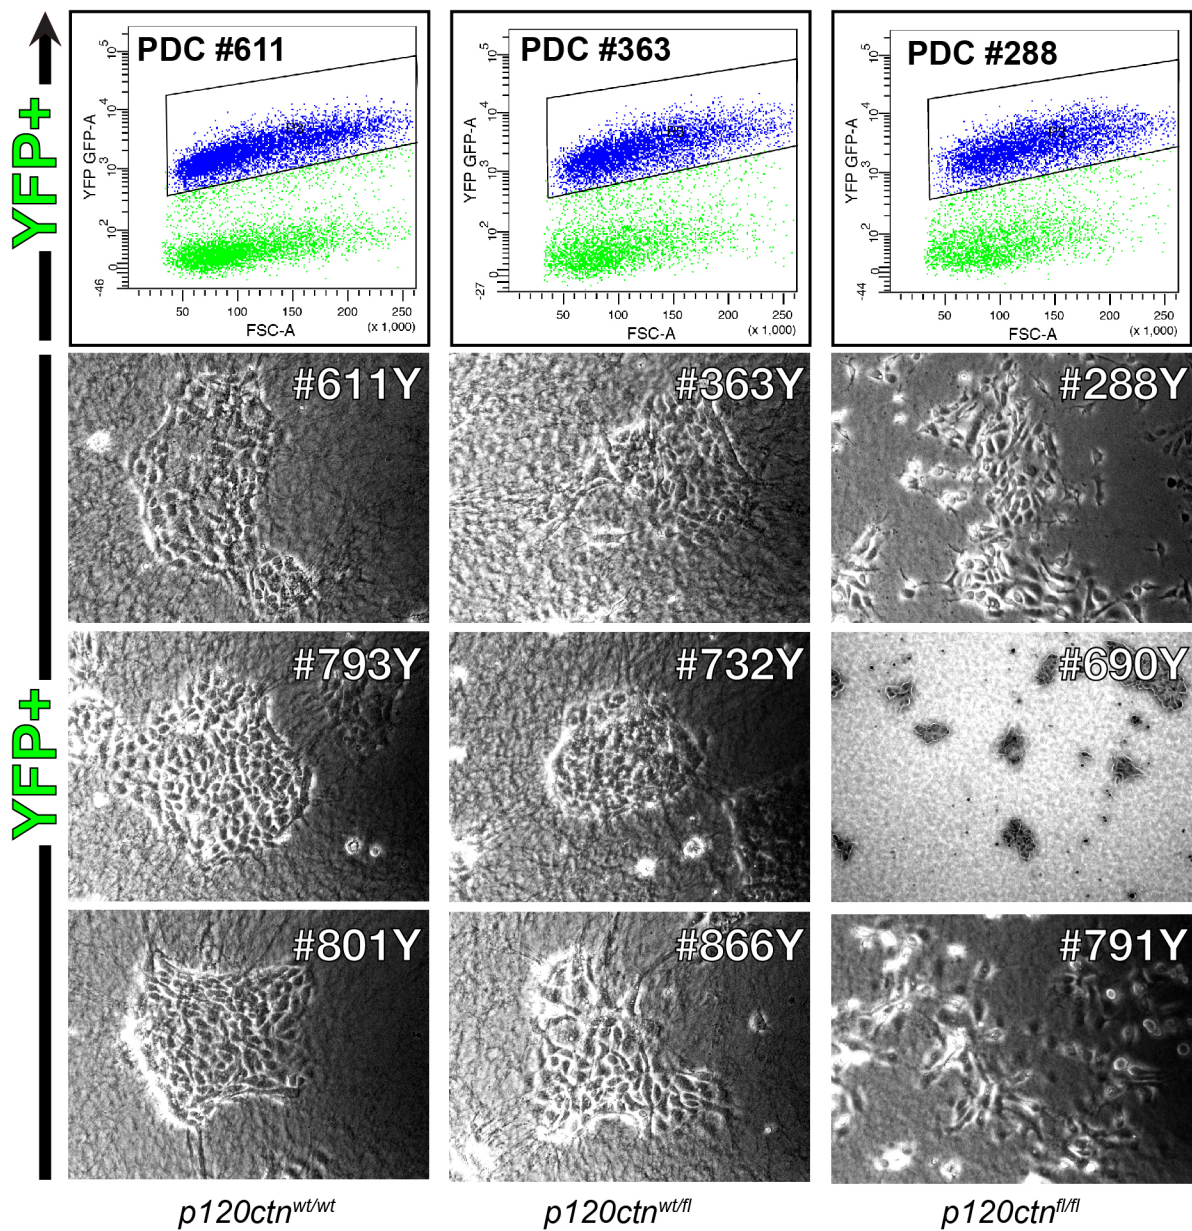

*Kras<sup>G12D/wt</sup>; Rosa26<sup>YFP</sup>*

B

*Kras<sup>G12D/wt</sup>; Rosa26<sup>YFP</sup>*

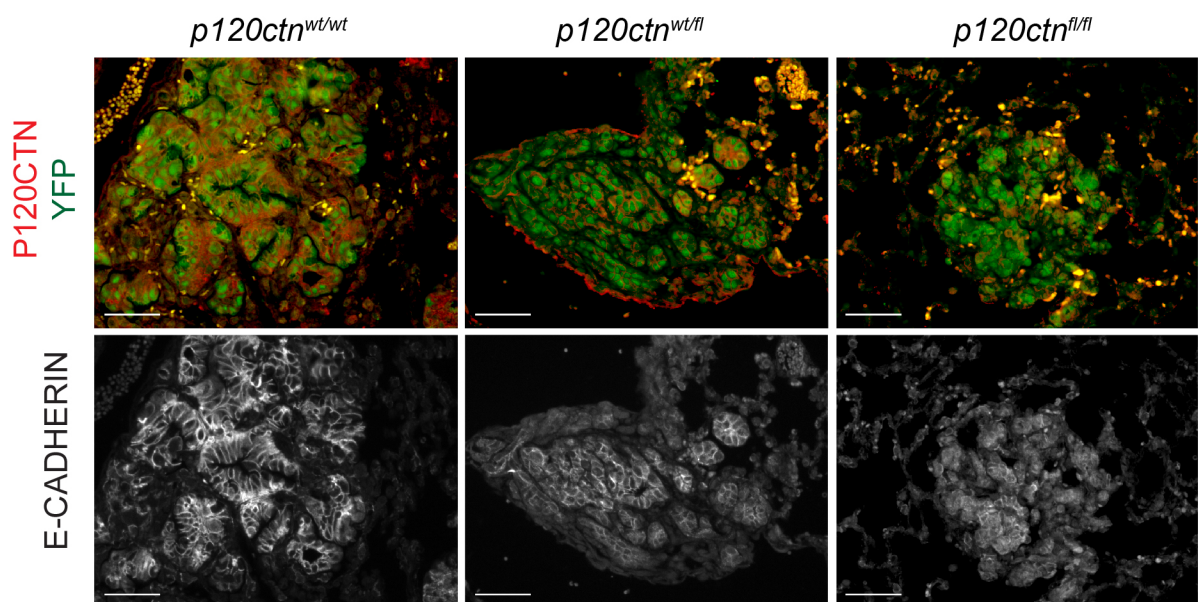

**A**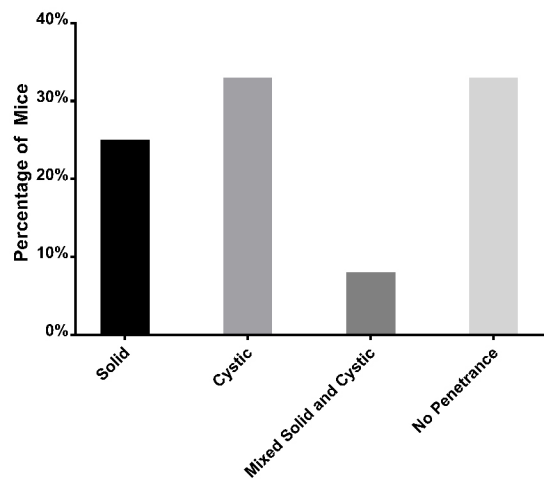**B**

Examples of Gross Pathology in Nude Mice 180 Days Post-Orthotopic Injection with *Kras*<sup>G12D/wt</sup>; *p120ctn*<sup>w<sup>t</sup>/fl</sup>; *Rosa26*<sup>YFP</sup> cells

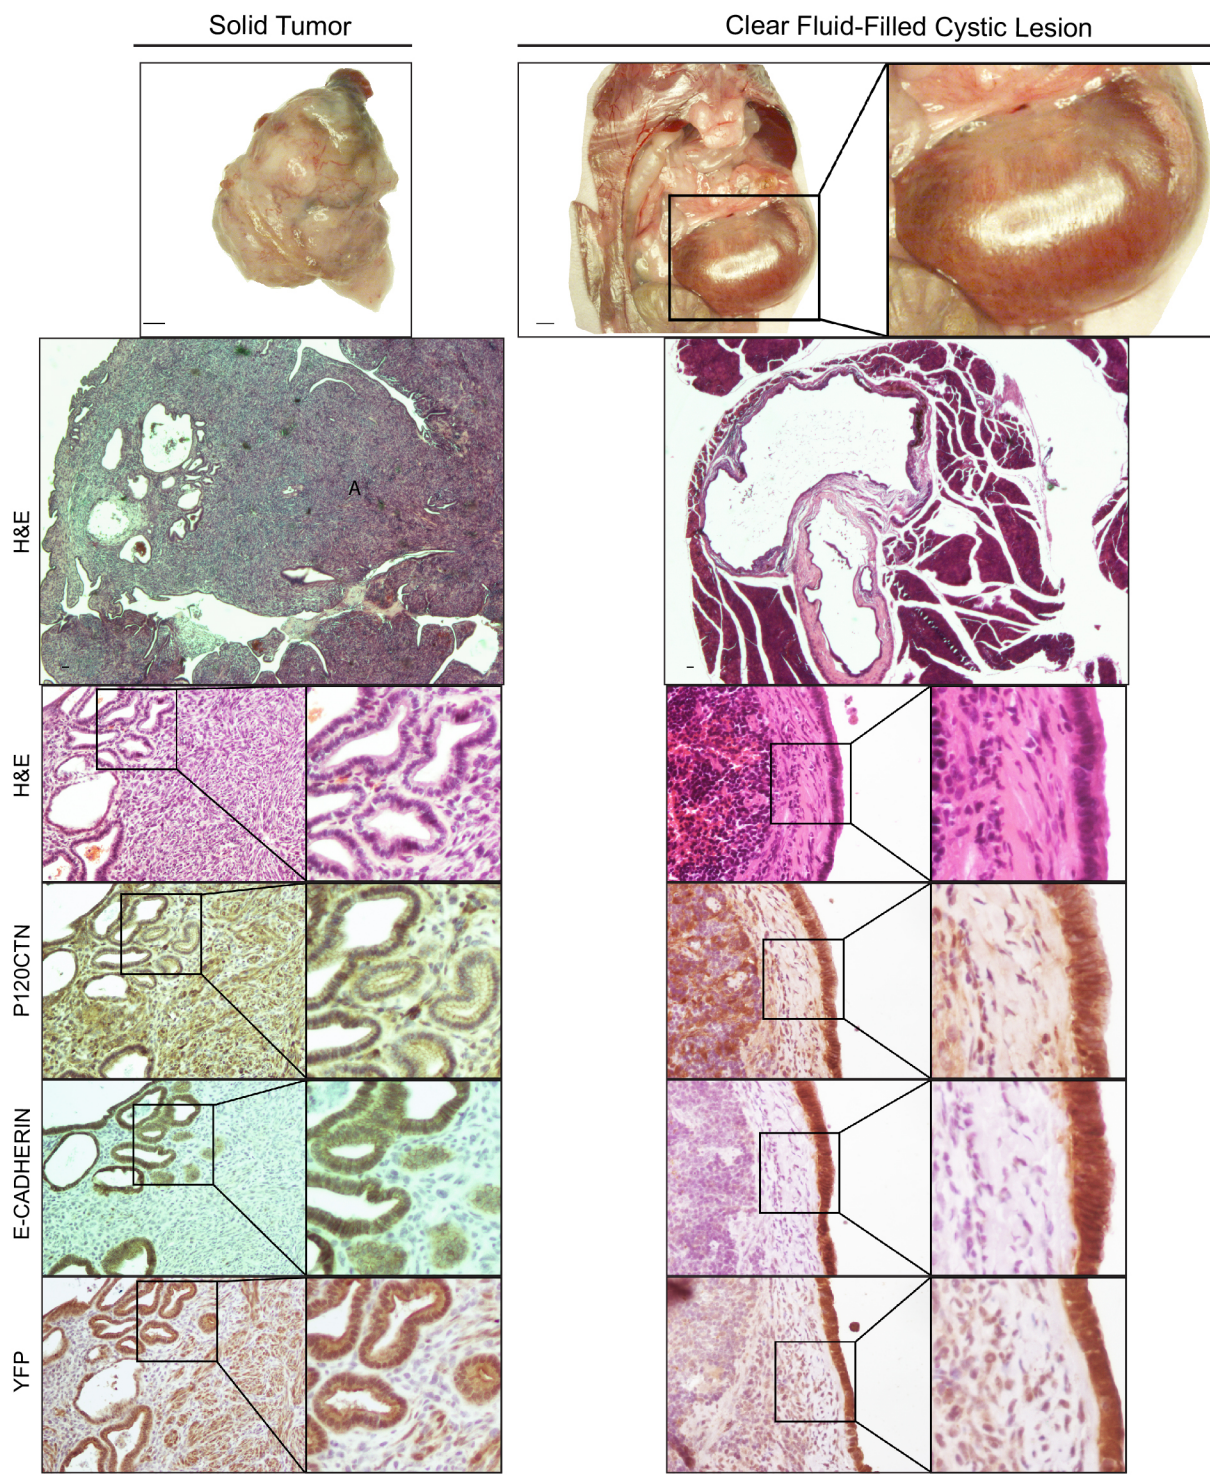

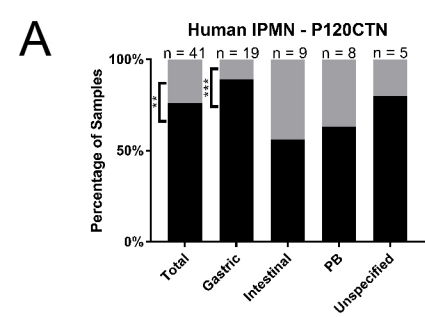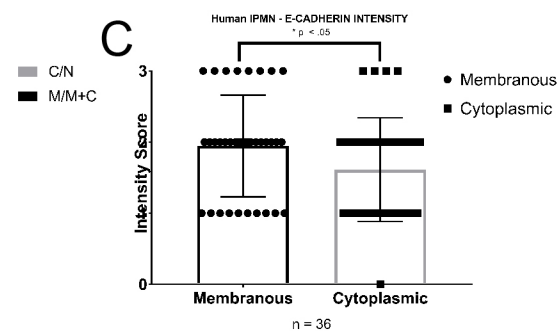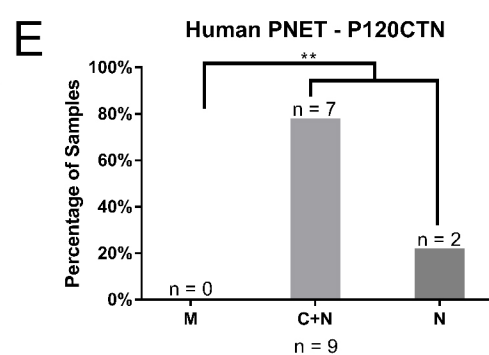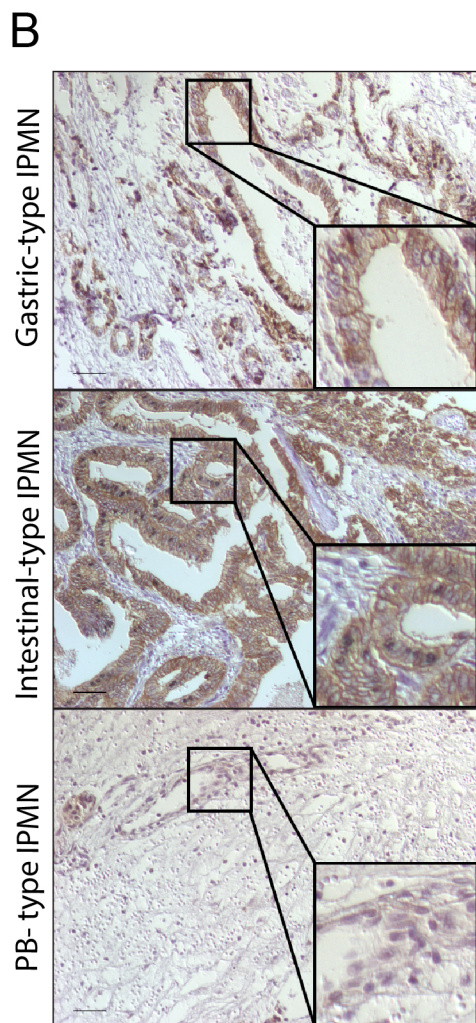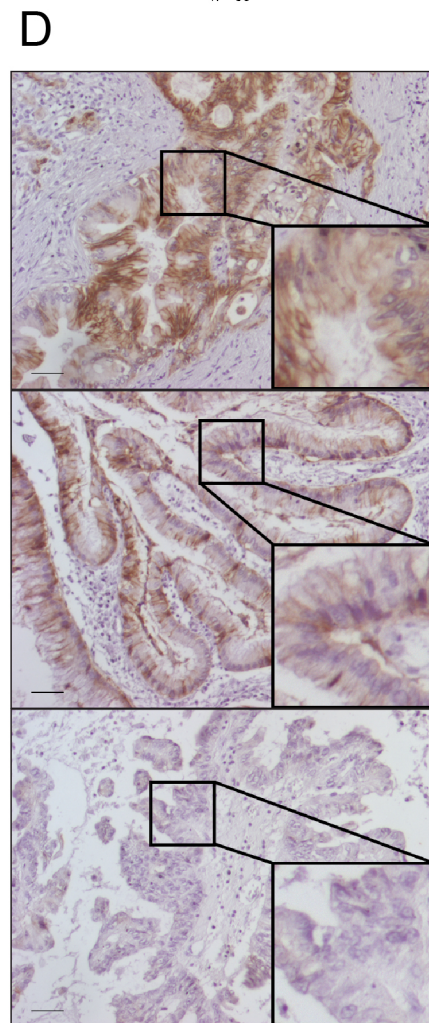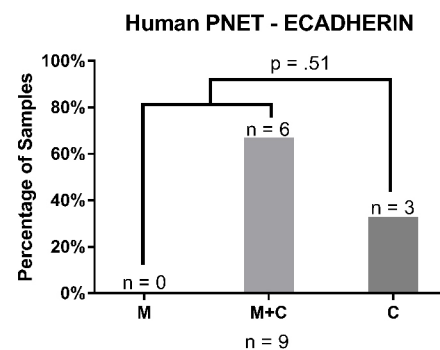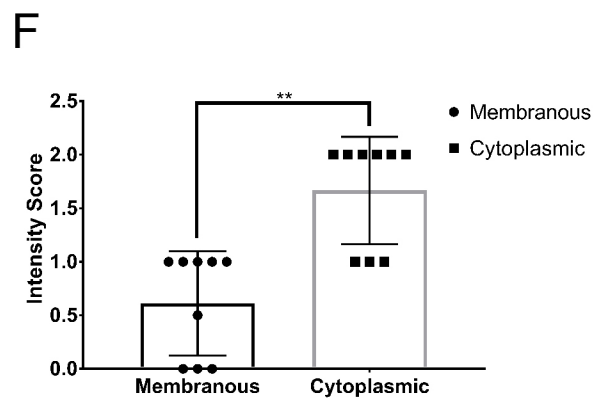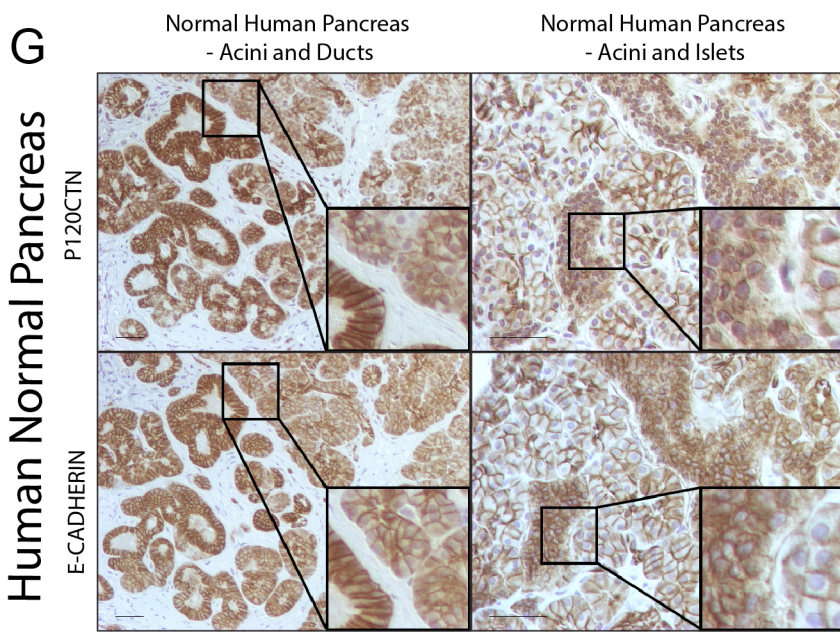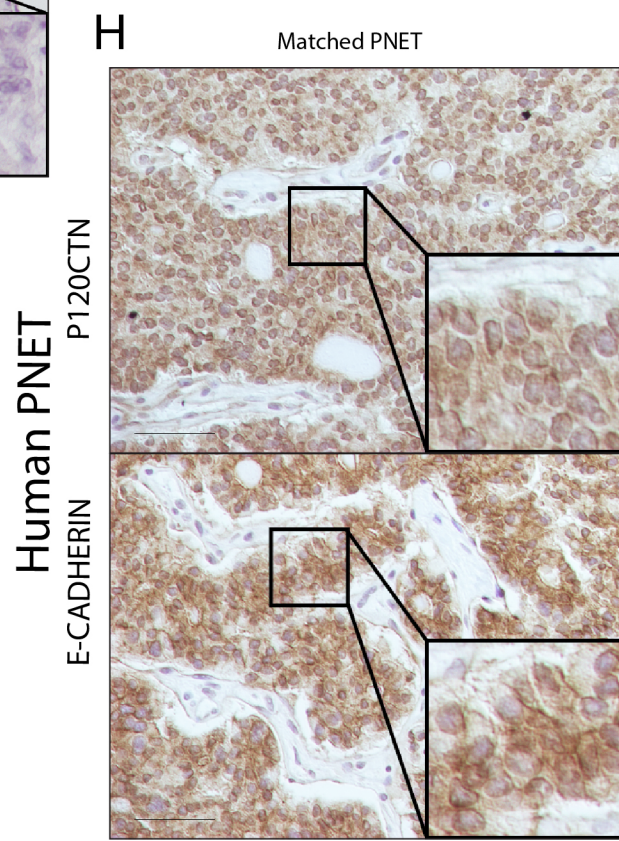

# The role of p120catenin in regulating the EMT-MET spectrum and metastatic organotropism in pancreatic cancer

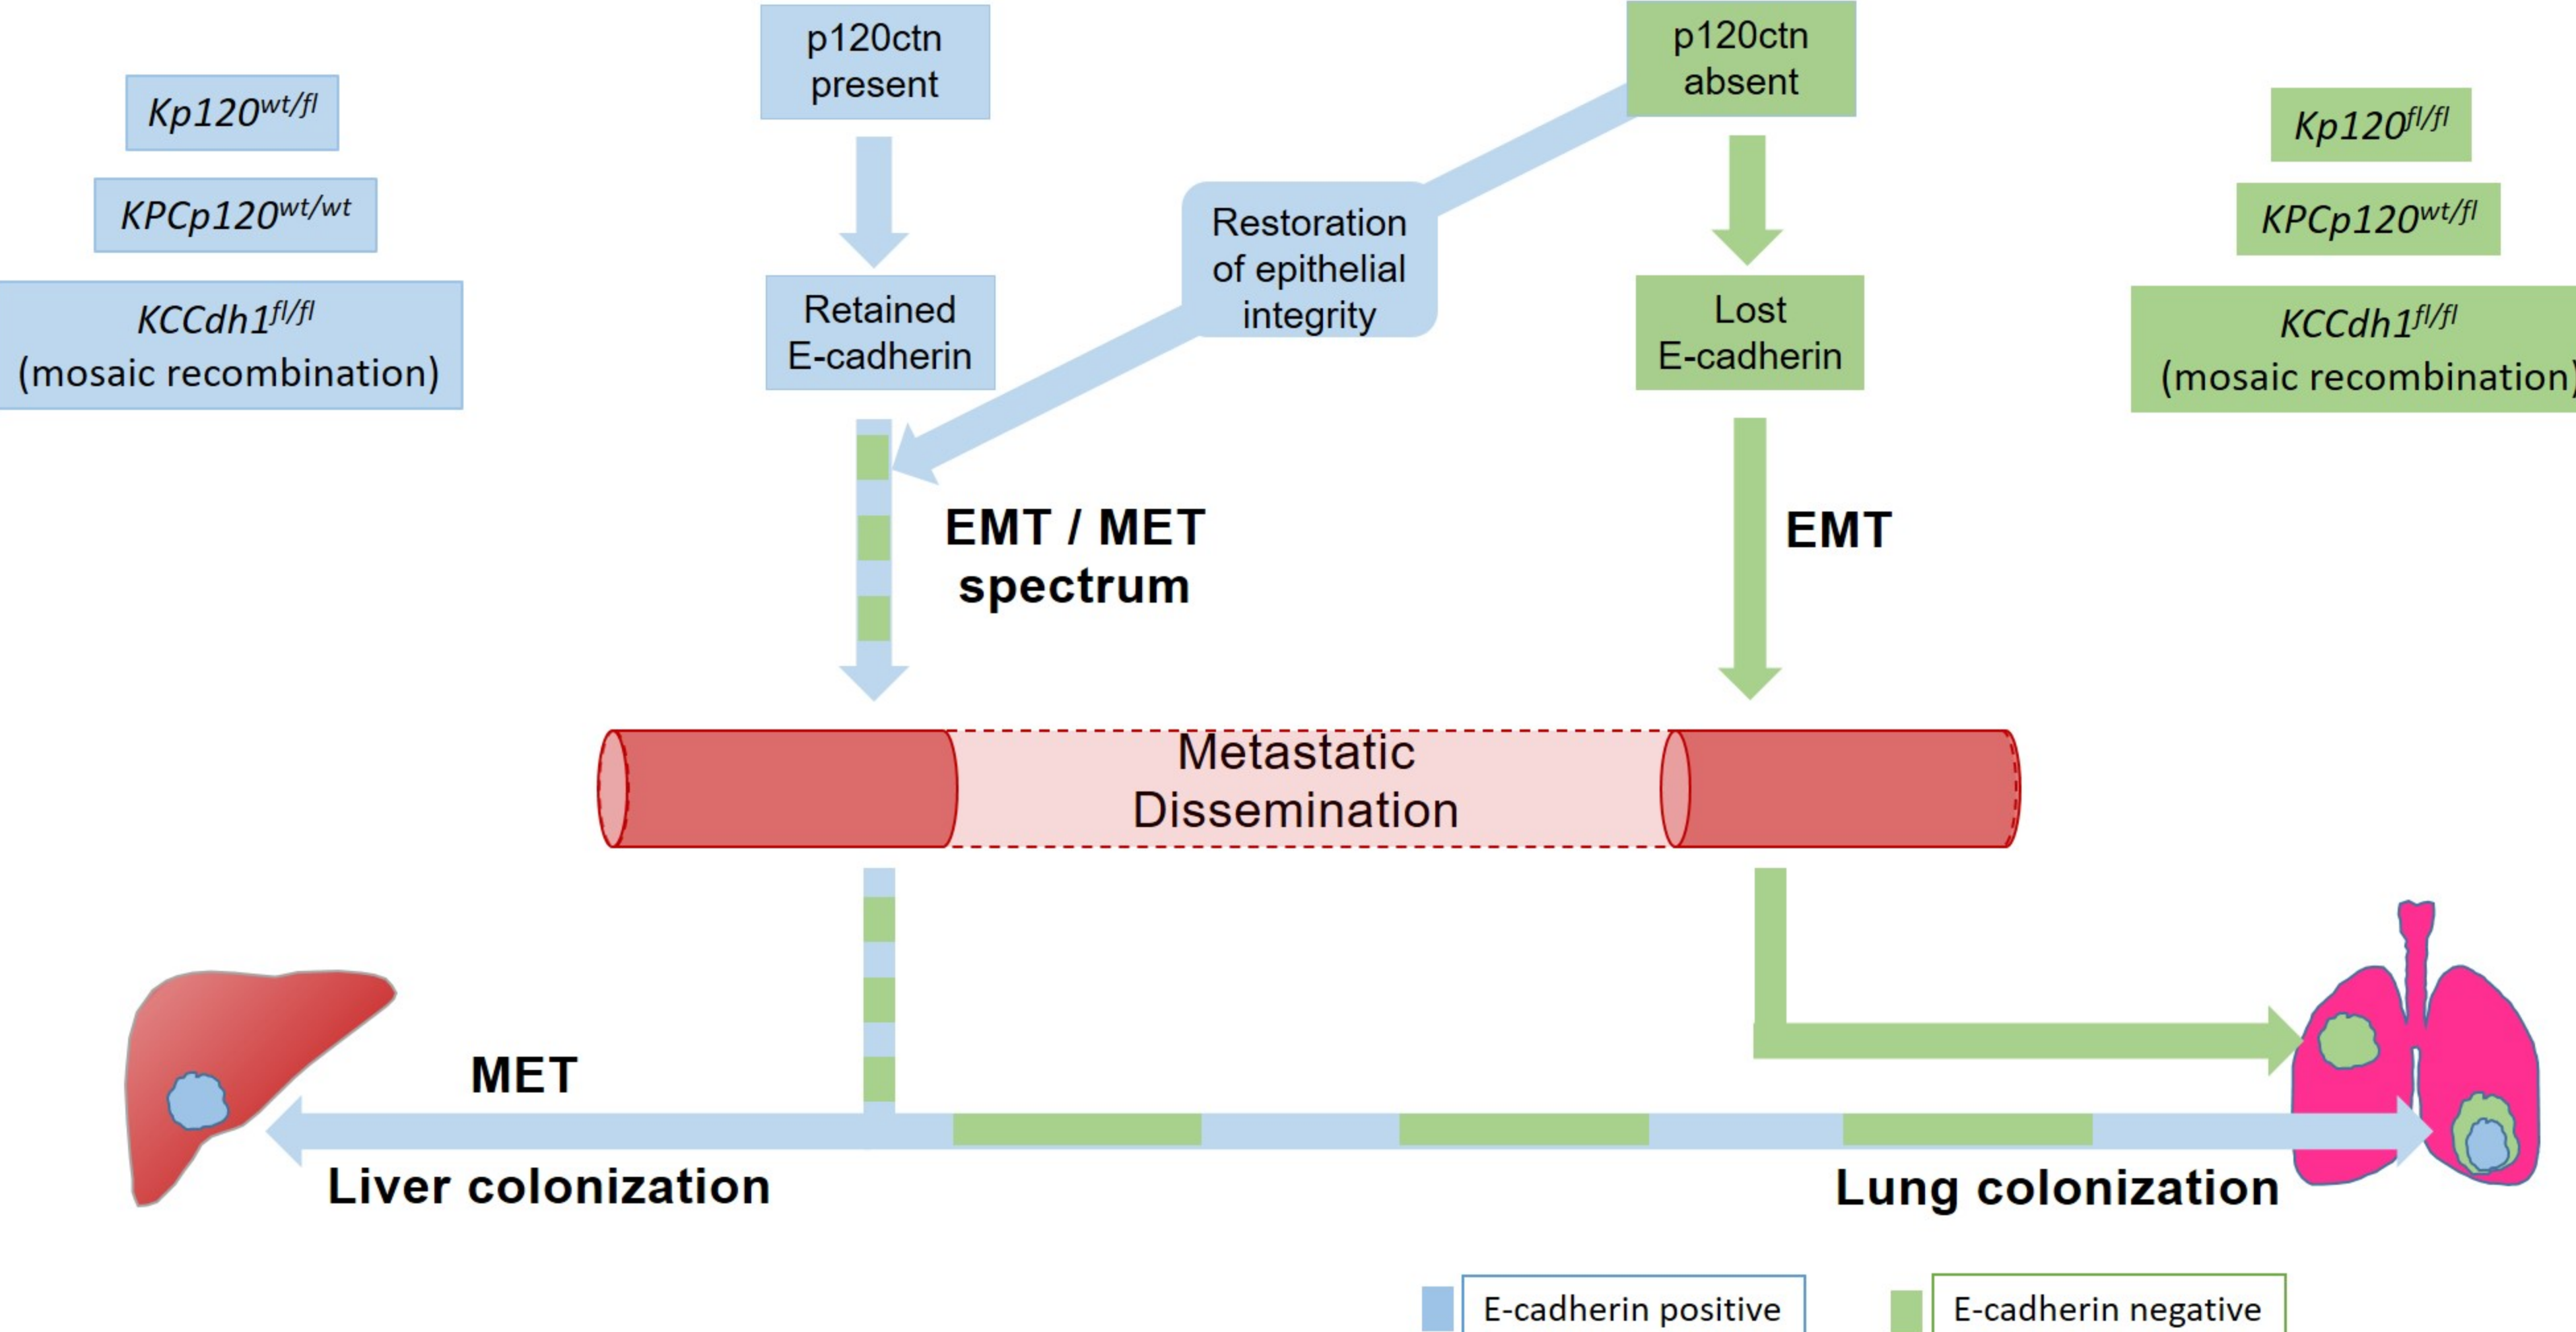

| <b><i>Pdx1-cre; KRAS<sup>G12D/+</sup></i></b> | <b>Age (weeks)</b> | <b>Classification</b>      | <b>Additional Notes</b>                 |
|-----------------------------------------------|--------------------|----------------------------|-----------------------------------------|
| 614                                           | 4.5                | Normal                     |                                         |
| 616                                           | 4.5                | Normal                     |                                         |
| 1328                                          | 6                  | Acinar Atrophy             | Focal Necrosis                          |
| 703                                           | 7                  | Normal                     |                                         |
| 799                                           | 8.2                | Normal                     |                                         |
| 540                                           | 8.3                | Normal                     |                                         |
| 1349                                          | 9.4                | PanIN1A                    |                                         |
| 1346                                          | 9.4                | Normal                     |                                         |
| 658                                           | 10                 | Normal                     |                                         |
| 981                                           | 11                 | Normal                     |                                         |
| 1099                                          | 11                 | PanIN1A                    |                                         |
| 702                                           | 13.2               | Normal                     |                                         |
| 313                                           | 15                 | PanIN1A/IPMN-like dilation | IPMN-like dilatation of pancreatic duct |
| 414                                           | 16                 | Normal                     |                                         |
| 1304                                          | 16.6               | Normal                     |                                         |
| 390                                           | 18                 | Normal                     |                                         |
| 633                                           | 19.1               | Ductalization              |                                         |
| 1274                                          | 20                 | PanIN1A                    |                                         |
| 335                                           | 22.9               | ADM                        |                                         |
| 1258                                          | 23.7               | PanIN1B                    |                                         |
| 1257                                          | 23.7               | Focal Duct Dilation        |                                         |
| 1252                                          | 23.7               | ADM                        |                                         |
| 316                                           | 23.9               | PanIN1A                    |                                         |
| 1210                                          | 32.8               | PanIn1A                    |                                         |
| 1179                                          | 35.7               | Normal                     |                                         |
| 1178                                          | 35.7               | PanIN1A                    |                                         |
| 1177                                          | 35.7               | PanIN1A                    |                                         |
| 1176                                          | 35.7               | PanIN1A/1B                 |                                         |
| 1175                                          | 35.7               | PanIN1A/1B                 |                                         |
| 1103                                          | 40-50              | PanIN1A                    |                                         |
| 1101                                          | 40-50              | PanIN1A/1B                 |                                         |
| 7548                                          | 58                 | PanIN1A/1B                 |                                         |

Table S1: Detailed Breakdown of Classification of 32 *Pdx1-cre; KRAS<sup>G12D/+</sup>* Mice



| <i>Pdx1-cre; KRAS<sup>G12D/+</sup>; p120ctn<sup>+/-fl</sup></i> | Age (weeks) | Classification                        | Additional Note                                                                  |
|-----------------------------------------------------------------|-------------|---------------------------------------|----------------------------------------------------------------------------------|
| <b>238</b>                                                      | 3           | Ductalization                         |                                                                                  |
| <b>607</b>                                                      | 5           | Ductalization                         |                                                                                  |
| <b>696</b>                                                      | 5           | Normal                                |                                                                                  |
| <b>243</b>                                                      | 6           | PanIN3 associated with cystic changes |                                                                                  |
| <b>1125</b>                                                     | 7.9         | Normal                                |                                                                                  |
| <b>648</b>                                                      | 8           | Normal                                |                                                                                  |
| <b>995</b>                                                      | 8           | PanIN1A                               |                                                                                  |
| <b>869</b>                                                      | 9.4         | PanIN1B                               |                                                                                  |
| <b>520</b>                                                      | 9.5         | PanIN1B/IPMN-like change              | Branch duct IPMN-like multilocular cystic lesion with low grade mucinous lining. |
| <b>1023</b>                                                     | 10          | Normal                                |                                                                                  |
| <b>516</b>                                                      | 10.7        | Ductalization                         |                                                                                  |
| <b>515</b>                                                      | 11          | Normal                                |                                                                                  |
| <b>334</b>                                                      | 14          | PanIN1B/IPMN-like change              | Branch duct IPMN-like multilocular cystic lesion with low grade mucinous lining. |
| <b>1040</b>                                                     | 14          | PanIN1A/IPMN-like change              |                                                                                  |
| <b>597</b>                                                      | 17          | Normal                                |                                                                                  |
| <b>346</b>                                                      | 20          | PanIN1A                               |                                                                                  |
| <b>248</b>                                                      | 20          | PDAC                                  | Liver metastasis present.                                                        |
| <b>354</b>                                                      | 20          | PDAC                                  |                                                                                  |
| <b>685</b>                                                      | 21.1        | PanIN1B                               |                                                                                  |
| <b>680</b>                                                      | 21.1        | PanIN1B                               |                                                                                  |
| <b>686</b>                                                      | 21.1        | PanIN1B/MCN                           |                                                                                  |
| <b>369</b>                                                      | 21.6        | PanIN1B                               |                                                                                  |
| <b>366</b>                                                      | 22          | Normal                                |                                                                                  |
| <b>340</b>                                                      | 23.9        | PanIN1B                               |                                                                                  |
| <b>322</b>                                                      | 25.4        | Normal                                |                                                                                  |
| <b>327</b>                                                      | 25.7        | PanIN1B                               |                                                                                  |
| <b>557</b>                                                      | 30          | Normal                                |                                                                                  |
| <b>244</b>                                                      | 33.5        | MCN                                   |                                                                                  |

|             |       |                          |                                                                                                       |
|-------------|-------|--------------------------|-------------------------------------------------------------------------------------------------------|
| <b>1074</b> | 34.1  | MCN                      | possible MCN? Periepithelial stroma + and epithelium mostly nonmucinous                               |
| <b>1063</b> | 34.6  | PanIN1A & 1B/MCN         | possible MCN, focal sarcomatoid tumour                                                                |
| <b>753</b>  | 35    | IPMN-like change         |                                                                                                       |
| <b>1187</b> | 35.4  | PanIN1B                  | Pseudoneoplastic islet cell hyperplasia                                                               |
| <b>1183</b> | 35.4  | PanIN1B                  | Pseudoneoplastic islet cell hyperplasia                                                               |
| <b>1035</b> | 39.1  | PanIN1B                  |                                                                                                       |
| <b>1104</b> | 42.3  | PanIN1B                  |                                                                                                       |
| <b>1067</b> | 44.1  | PanIN1B                  | possible sarcoma, small focus; Pseudoneoplastic islet cell hyperplasia                                |
| <b>1038</b> | 40-50 | PanIN1B                  |                                                                                                       |
| <b>990</b>  | 55.7  | PanIN1B/IPMN-like change | marked dilatation of main duct the head (ipmn like changes?); Pseudoneoplastic islet cell hyperplasia |

Table S2: Detailed Breakdown of Classification of 38 *Pdx1-cre; KRAS<sup>G12D/+</sup>; p120ctn<sup>+/-fl</sup>* Mice

| <i>Pdx1-cre; KRAS<sup>G12D/+</sup>; p53<sup>+/-fl</sup></i> | Age (weeks) | Lung      | Liver     |
|-------------------------------------------------------------|-------------|-----------|-----------|
| 1087                                                        | 16          | 0         | 7         |
| 1096                                                        | 13.3        | 2         | 14        |
| 1353                                                        | 9.7         | 0         | 0         |
| 1344                                                        | 0-10        | 0         | 19        |
| 1276                                                        | 13.1        | Infarcted | Infarcted |
| 1236                                                        | 17.7        | Infarcted | Infarcted |
| 1303                                                        | 16.9        | 0         | 0         |
| 2032                                                        | 25          | 0         | 0         |
| 2061                                                        | 23          | 1         | 1         |
| 2041                                                        | 38.7        | 2         | 0         |
| PD 437                                                      | Unknown     | 0         | 1         |
| PD 9238                                                     | 15.8        | 0         | 18        |
| PD 8078                                                     | 27.1        | 564       | 1         |
| PD 8963                                                     | Unknown     | 3         | 72        |
| PD 9402                                                     | 13.8        | 0         | 1         |
| PD 422                                                      | 34.2        | 0         | 7         |
| PD 431                                                      | 31.1        | 0         | 6         |
| PD 635                                                      | 23          | 1         | 8         |

Table S3: Quantification of Metastatic Burden in 18 *Pdx1-cre; KRAS<sup>G12D/+</sup>; p53<sup>+/-fl</sup>* Mice Used for Determination of Liver or Lung Dominance

| <b><i>Pdx1-cre; KRAS<sup>G12D/+</sup>; p53<sup>+/-</sup>; p120ctn<sup>+/-</sup></i></b> | <b>Age (weeks)</b> | <b>Lung</b>                                    | <b>Liver</b> |
|-----------------------------------------------------------------------------------------|--------------------|------------------------------------------------|--------------|
| <b>958</b>                                                                              | 6                  | 0                                              | 0            |
| <b>1037</b>                                                                             | 17                 | 3                                              | 0            |
| <b>1072</b>                                                                             | 17                 | Saturated - Unquantifiable                     | 0            |
| <b>1355</b>                                                                             | 9.7                | 0                                              | 0            |
| <b>2113</b>                                                                             | 11.5               | 0                                              | 0            |
| <b>2126</b>                                                                             | 23.9               | 2 (including one large macroscopic metastasis) | 0            |
| <b>2143</b>                                                                             | 22.7               | 0                                              | 3            |
| <b>2173</b>                                                                             | 11.3               | 0                                              | 0            |
| <b>2187</b>                                                                             | 14.9               | 1                                              | 1            |
| <b>2278</b>                                                                             | 19                 | 1 (including one large macroscopic metastasis) | 0            |

*Table S4: Quantification of Metastatic Burden in 10 Pdx1-cre; KRAS<sup>G12D/+</sup>; p53<sup>+/-</sup>; p120ctn<sup>+/-</sup> Mice Used for Determination of Liver or Lung Dominance*

| Cell Line | Transplantation Set | Mouse ID | Days post-injection | Tumor Penetrance | Liver Metastasis | Lung Metastasis |
|-----------|---------------------|----------|---------------------|------------------|------------------|-----------------|
| 791Y      | B                   | 20       | 70                  | Yes              | No               | No              |
| 791Y      | B                   | 23       | 70                  | Yes              | No               | Yes             |
| 791Y      | B                   | 26       | 57                  | No               | N/A              | N/A             |
| 791Y      | L                   | 14       | 95                  | Yes              | No               | Yes             |
| 791Y      | L                   | 16       | 76                  | Yes              | No               | Yes             |
| 288Y      | C                   | 1        | 84                  | Yes              | No               | Yes             |
| 288Y      | C                   | 2        | 75                  | Yes              | No               | Yes             |
| 288Y      | C                   | 4        | 102                 | No               | N/A              | N/A             |
| 288Y      | C                   | 5        | 102                 | Yes              | No               | No              |
| 288Y      | C                   | 6        | 99                  | Yes              | No               | No              |
| 288Y      | C                   | 7        | 99                  | Yes              | No               | No              |
| 288Y      | C                   | 44       | 98                  | Yes              | No               | Yes             |

Table S5: Detailed Classification of all Long-Term Orthotopic Transplantation with *KRAS*<sup>G12D/+</sup>; *p120ctn*<sup>fl/fl</sup>; *Rosa26*<sup>YFP</sup> Cells

| Cell Line | Transplantation Set | Mouse ID | Days post-injection | Tumor Penetrance | Liver Metastasis                  | Lung Metastasis           |
|-----------|---------------------|----------|---------------------|------------------|-----------------------------------|---------------------------|
| 791Y      | A                   | 8        | 84                  | Yes              | No fluorescence available, but no | No fluorescence, excluded |
| 791Y      | A                   | 10       | 62                  | Yes              | No fluorescence available, but no | No fluorescence, excluded |
| 791Y      | A                   | 11       | 79                  | Yes              | Yes                               | No fluorescence, excluded |
| 791Y      | B                   | 24       | 70                  | Yes              | Yes                               | Yes                       |
| 791Y      | B                   | 24       | 70                  | Yes              | Yes                               | Yes                       |
| 791Y      | B                   | 27       | 67                  | Yes              | Yes                               | Yes                       |
| 791Y      | G                   | 30       | 93                  | Yes              | Yes                               | Yes                       |
| 791Y      | G                   | 31       | 52                  | Yes              | Yes                               | Yes                       |
| 791Y      | G                   | 33       | 49                  | Yes              | Yes                               | Yes                       |
| 791Y      | G                   | 34       | 46                  | Yes              | Yes                               | Yes                       |
| 288Y      | C                   | 8        | 88                  | Yes              | No                                | No                        |
| 288Y      | C                   | 9        | 88                  | Yes              | No                                | No                        |
| 288Y      | C                   | 10       | 88                  | Yes              | No                                | Yes                       |
| 288Y      | C                   | 11       | 80                  | Yes              | No                                | No                        |
| 288Y      | C                   | 13       | 70                  | Yes              | No                                | Yes                       |
| 288Y      | C                   | 45       | 82                  | Yes              | No                                | No                        |
| 288Y      | C                   | 46       | 82                  | Yes              | No                                | No                        |

Table S6: Detailed Classification of all Long-Term Orthotopic Transplantation with *KRAS*<sup>G12D/+</sup>; *p120ctn*<sup>fl/fl</sup>; *Rosa26*<sup>YFP</sup> Cells Rescued with p120ctn1A

| ID Metastasis | ID Primary tumor | Date of birth | age | Gender<br>(0=female, 1= male) | CTX (0=no, 1=yes) |
|---------------|------------------|---------------|-----|-------------------------------|-------------------|
| E/2014/10393  | E/2014/10393     | 2/22/1971     | 46  | 0                             | 0                 |
| E/2014/794    | E/2014/794       | 9/1/1968      | 49  | 1                             | 1                 |
| E/2014/13508  | E/2014/13508     | 11/17/1957    | 60  | 1                             | 0                 |
| E/2013/34659  | E/2013/34659     | 4/25/1939     | 78  | 0                             | 0                 |
| E/2013/33897  | E/2013/33897     | 1/4/1948      | 69  | 1                             | 0                 |
| E/2013/31750  | E/2013/31750     | 11/26/1941    | 75  | 1                             | 0                 |
| E/2013/31749  | E/2013/31749     | 12/28/1965    | 51  | 1                             | 1                 |
| E/2013/31457  | E/2012/016585    | 4/20/1963     | 54  | 0                             | 0                 |
| E/2013/28594  | E/2013/28594     | 11/12/1934    | 83  | 0                             | 0                 |
| E/2013/18357  | E/2013/035750    | 2/4/1951      | 66  | 0                             | 1                 |
| E/2013/028825 | E/2008/007691    | 12/1/1938     | 78  | 0                             | 0                 |
| E/2013/002879 | E/2013/002879    | 6/8/1956      | 61  | 0                             | 0                 |
| E/2012/37959  | E/2011/46424     | 2/1/1941      | 76  | 1                             | 0                 |
| E/2012/13235  | E/2011/28673     | 10/2/1949     | 68  | 1                             | 0                 |
| E/2012/6665   | E/2012/6665      | 12/14/1957    | 59  | 0                             | 1                 |
| E/2012/002947 | E/2012/3115      | 3/24/1961     | 56  | 0                             | 0                 |
| E/2011/046143 | E/2011/008097    | 10/14/1950    | 67  | 1                             | 0                 |

Table S7: Characteristics of Human Tumor Microarray
